# Supplementary material for: Incidence of diabetes-related complications in Chinese patients with type 1 diabetes: a population-based longitudinal cohort study in Taiwan
Source: PubMed Central journal article supplement — BMJ Open. 2017 Jun 21;7(6):e015117. doi: 10.1136/bmjopen-2016-015117 (PMC5791549; doi:10.1136/bmjopen-2016-015117), 2017-06-21
Supplement: bmjopen-2016-015117supp001.pdf [file bmjopen-2016-015117supp001.pdf]

**Supplementary Table 1: Diabetes-related acute and chronic complications**

| <b>Complications</b>                                                          | <b>ICD-9-CM<br/>disease codes</b>                                                                   | <b>ICD-9-CM<br/>procedure codes</b>                                                       | <b>NHI<br/>procedure codes</b>                   |
|-------------------------------------------------------------------------------|-----------------------------------------------------------------------------------------------------|-------------------------------------------------------------------------------------------|--------------------------------------------------|
| <b>CVD (cardiovascular disease and cerebrovascular disease)<sup>a,b</sup></b> |                                                                                                     |                                                                                           |                                                  |
| Acute myocardial infarction                                                   | 410, 412*                                                                                           | ---                                                                                       | ---                                              |
| Ischemic heart disease                                                        | 411, 413, 414, V45.81, V45.82                                                                       | 00.66, 36.0, 36.1, 36.2, 36.3, 36.9, 88.5                                                 | ---                                              |
| Heart failure                                                                 | 428                                                                                                 | ---                                                                                       | ---                                              |
| Stroke                                                                        | 430-437, 438*, V12.54                                                                               | 00.61, 00.63, 38.11, 38.12                                                                | ---                                              |
| Cardiogenic shock                                                             | 785.51                                                                                              | ---                                                                                       | ---                                              |
| Sudden cardiac arrest                                                         | V12.53                                                                                              | ---                                                                                       | ---                                              |
| Arteriosclerotic cardiovascular disease                                       | 429.2                                                                                               | ---                                                                                       | ---                                              |
| Arrhythmia                                                                    | 426, 427                                                                                            | ---                                                                                       | ---                                              |
| <b>Microvascular complications<sup>a,c</sup></b>                              |                                                                                                     |                                                                                           |                                                  |
| Nephropathy                                                                   | 250.4, 403, 404, 580, 581, 582, 583, 584, 585, 586, 587, 588, 593, 791.0, V13.03, V42.0, V45.1, V56 | 38.95, 39.27, 39.42, 39.95, 54.98, 55.4, 55.5, 55.6                                       | ---                                              |
| Renal failure (dialysis or transplantation) <sup>d</sup>                      | V45.1, V56                                                                                          | 39.95, 54.98, 55.6                                                                        | ---                                              |
| Retinopathy                                                                   | 250.5, 361, 362, 364, 365, 366, 368, 369, 377, 379.2                                                | 12.41, 12.73, 14.23, 14.24, 14.25, 14.33, 14.34, 14.35, 14.53, 14.54, 14.55, 16.92, 16.99 | 86206B, 86207B, 60001C, 60002C*, 60003C, 60004C* |
| Proliferative retinopathy <sup>d</sup>                                        | 362.02                                                                                              | ---                                                                                       | 60001C, 60002C*, 60003C, 60004C*                 |
| Sight-threatening diabetic retinopathy <sup>e</sup>                           | ---                                                                                                 | ---                                                                                       | 86206B, 86207B, 60001C, 60002C*, 60003C, 60004C* |
| Neuropathy                                                                    | 250.6, 302.72, 337.1, 354, 355, 357.2, 358.1, 607.84, 713.5, 729.2                                  | ---                                                                                       | ---                                              |
| <b>Metabolic complications</b>                                                |                                                                                                     |                                                                                           |                                                  |
| Diabetic ketoacidosis <sup>a</sup>                                            | 250.1                                                                                               | ---                                                                                       | ---                                              |
| Hypoglycemia <sup>a,f</sup>                                                   | 251.0, 251.1, 251.2, 270.3, 775.0, 775.6                                                            | ---                                                                                       | ---                                              |

\*For identifying prevalent cases only. a: *Nutr Metab Cardiovasc Dis.* 2014;24(1):10-7. b: *Pharmacoepidemiol Drug Saf.* 2009;18(6):497-503. c: *Diabetes Care.* 2008;31(3):596-615. d: *Diabetes.* 2006;55(5):1463-9. e: *JAMA Ophthalmol.* 2014;132(8):922-928. f: *BMC Endocr Disord.* 2008;8:4. Abbreviations: ICD-9-CM: International Classification of Diseases, Ninth Revision, Clinical Modification, NHI: Taiwan National Health Insurance.

**Supplementary Table 2: Incidence density of hospitalized hypoglycemia among patients with incident type 1 diabetes diagnosed between 1999 and 2013 (using primary diagnosis to define hospitalization for hypoglycemia)**

|                                                    | Overall patients  | Male subgroup             |                                            |                             | Female subgroup   |                                              |                               |
|----------------------------------------------------|-------------------|---------------------------|--------------------------------------------|-----------------------------|-------------------|----------------------------------------------|-------------------------------|
|                                                    |                   | Overall male <sup>‡</sup> | Male early-onset (0-12 years) <sup>‡</sup> | Male late-onset (≥13 years) | Overall female    | Female early-onset (0-12 years) <sup>‡</sup> | Female late-onset (≥13 years) |
| No. of cases*                                      | 4,001             | 1,903                     | 719                                        | 1,184                       | 2,098             | 777                                          | 1,321                         |
| No. of cases with event                            | 36                | 12                        | 4                                          | 8                           | 24                | 6                                            | 18                            |
| Follow-up time (person-years) <sup>†</sup>         | 27,374            | 13,205                    | 5,327                                      | 7,878                       | 14,169            | 5,890                                        | 8,280                         |
| Incidence density (1,000 person-years)<br>(95% CI) | 1.32<br>(0.9-1.8) | 0.91<br>(0.5-1.6)         | 0.75<br>(0.2-1.9)                          | 1.02<br>(0.4-2.0)           | 1.69<br>(1.1-2.5) | 1.02<br>(0.4-2.2)                            | 2.17<br>(1.3-3.4)             |

\* No. of cases refers to the number of patients who had no complication event of interest before type 1 diabetes was confirmed.

† Cumulative follow-up time (person-years) was calculated as the sum of follow-up years during observation period.

Note: Patients with type 1 diabetes were retrieved from incidence cases from 2000 to 2012. Follow-up time started from the first diagnosis date to the time the event occurred, death, discontinued enrollment from Taiwan's National Health Insurance Program, or the end of 2013, whichever came first.

‡ 95% CI of incidence density difference for male vs. female was [-1.6 to 0.1]; in male subgroup, early vs. late-onset was [-1.3 to 0.8]; and in female subgroup, early vs. late-onset was [-2.5 to 0.2].

Abbreviations: STDR: sight-threatening diabetic retinopathy, CVD: cardiovascular disease, DKA: diabetic ketoacidosis, CI: confidence interval.
