# Supplementary material for: Incidence of diabetes-related complications in Chinese patients with type 1 diabetes: a population-based longitudinal cohort study in Taiwan
Source: PubMed Central journal article supplement — BMJ Open. 2017 Jun 21;7(6):e015117. doi: 10.1136/bmjopen-2016-015117 (PMC5791549; doi:10.1136/bmjopen-2016-015117), 2017-06-21
Supplement: bmjopen-2016-015117supp002.pdf [file bmjopen-2016-015117supp002.pdf]

Supplementary Figure 1: Age-sex-specific cumulative incidences of diabetes complications according to duration of diabetes in patients with type 1 diabetes (early-onset: 0-12 years, late-onset:  $\geq 13$  years)

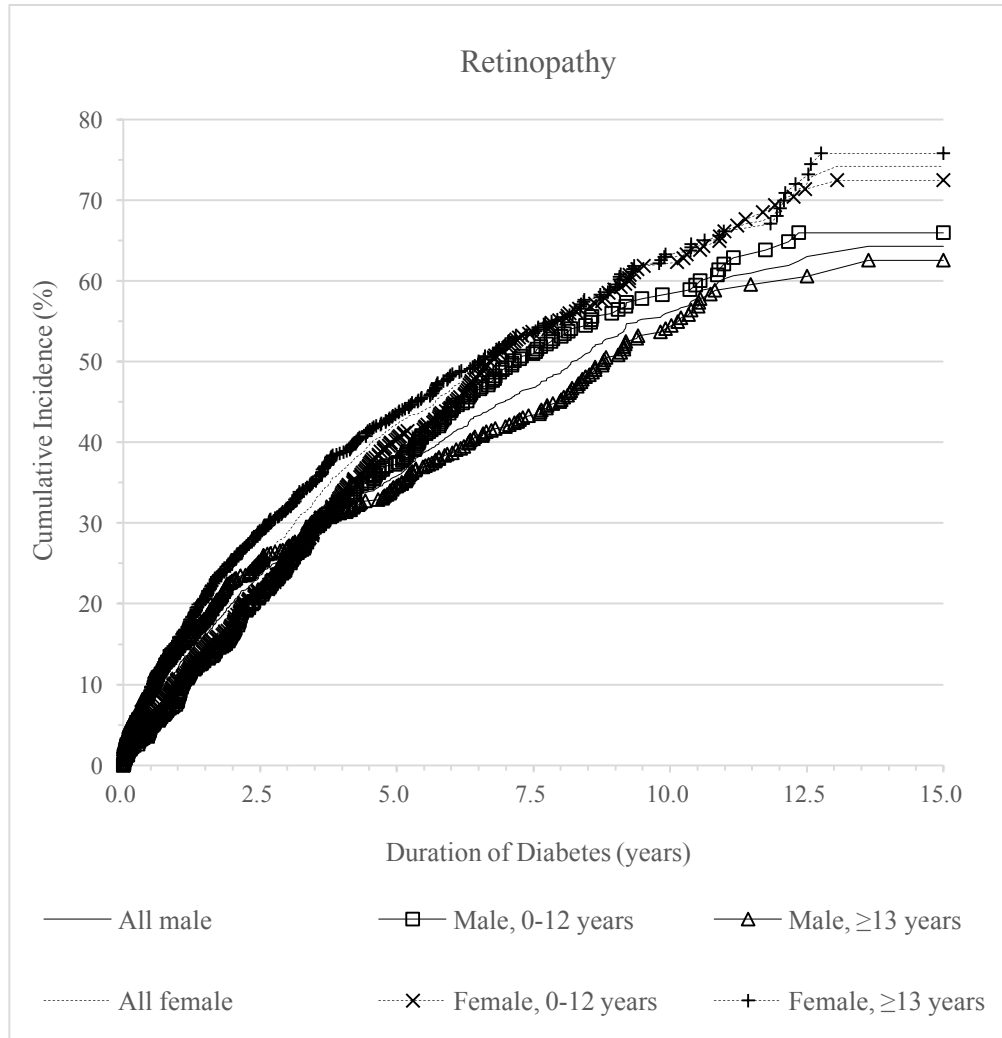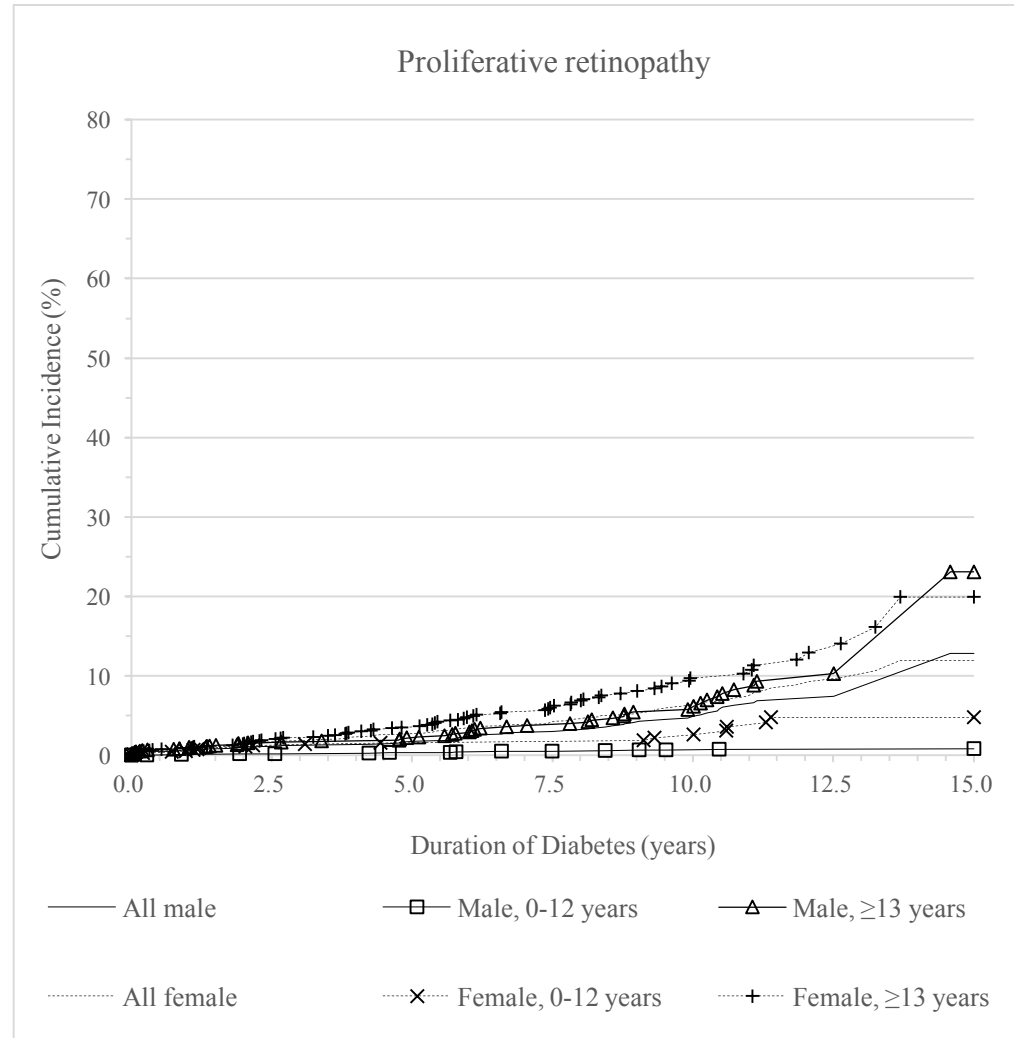

Sight-threatening diabetic retinopathy

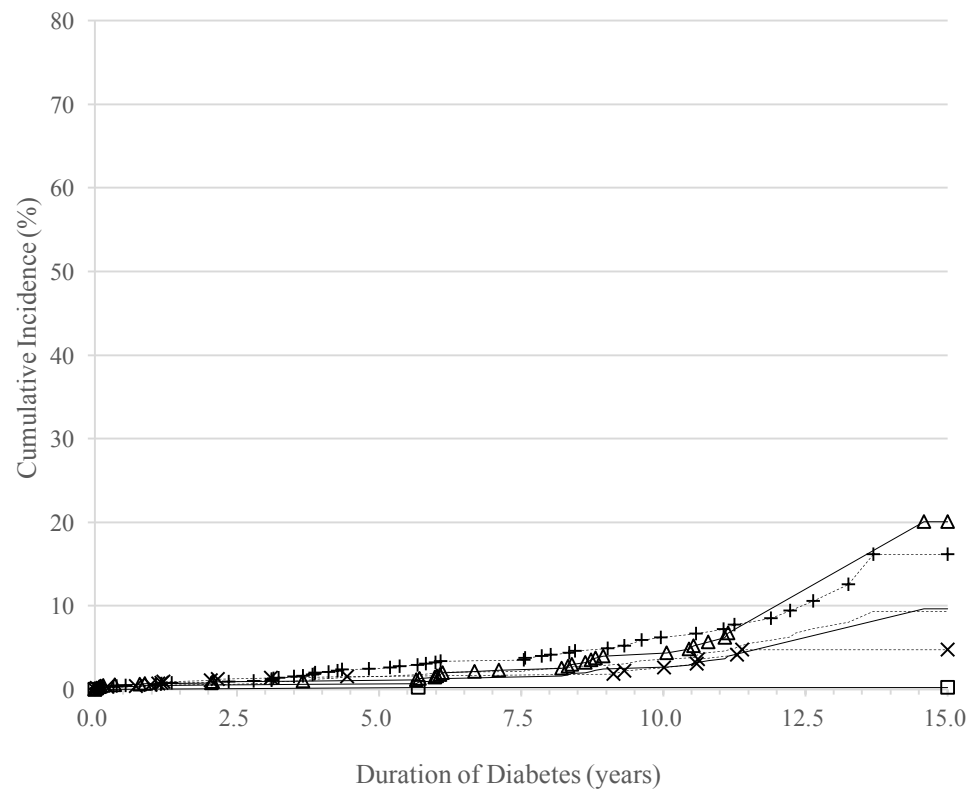

Neuropathy

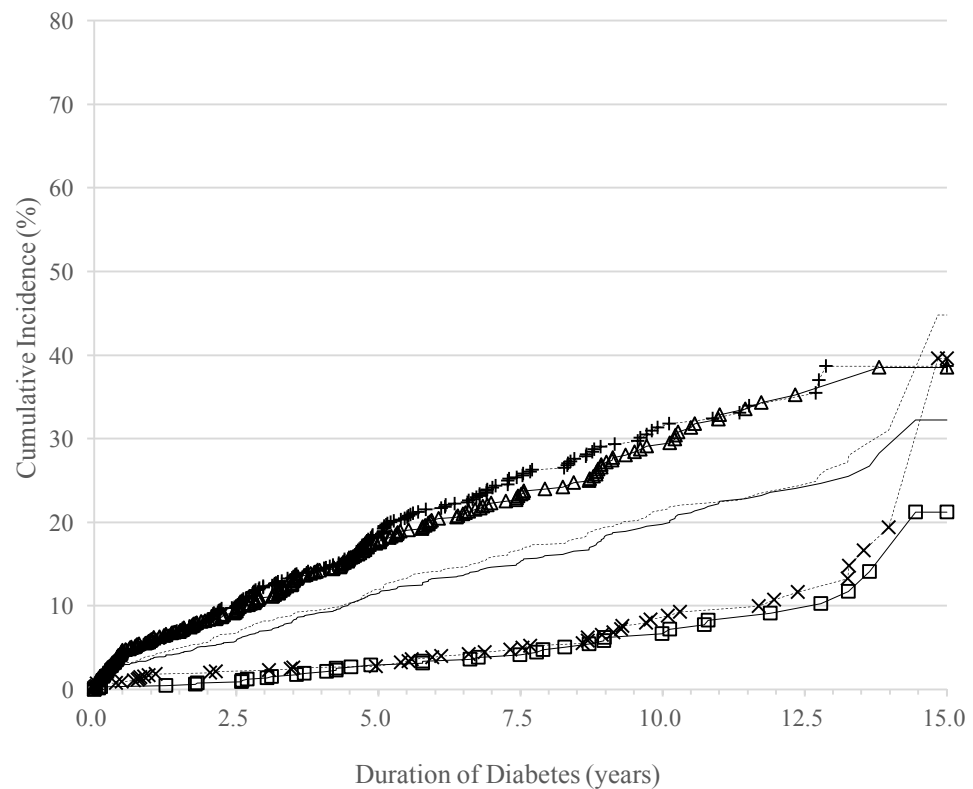

— All male      —□— Male, 0-12 years      —△— Male, ≥13 years  
 ..... All female      .....×..... Female, 0-12 years      .....+..... Female, ≥13 years

— All male      —□— Male, 0-12 years      —△— Male, ≥13 years  
 ..... All female      .....×..... Female, 0-12 years      .....+..... Female, ≥13 years

### Nephropathy

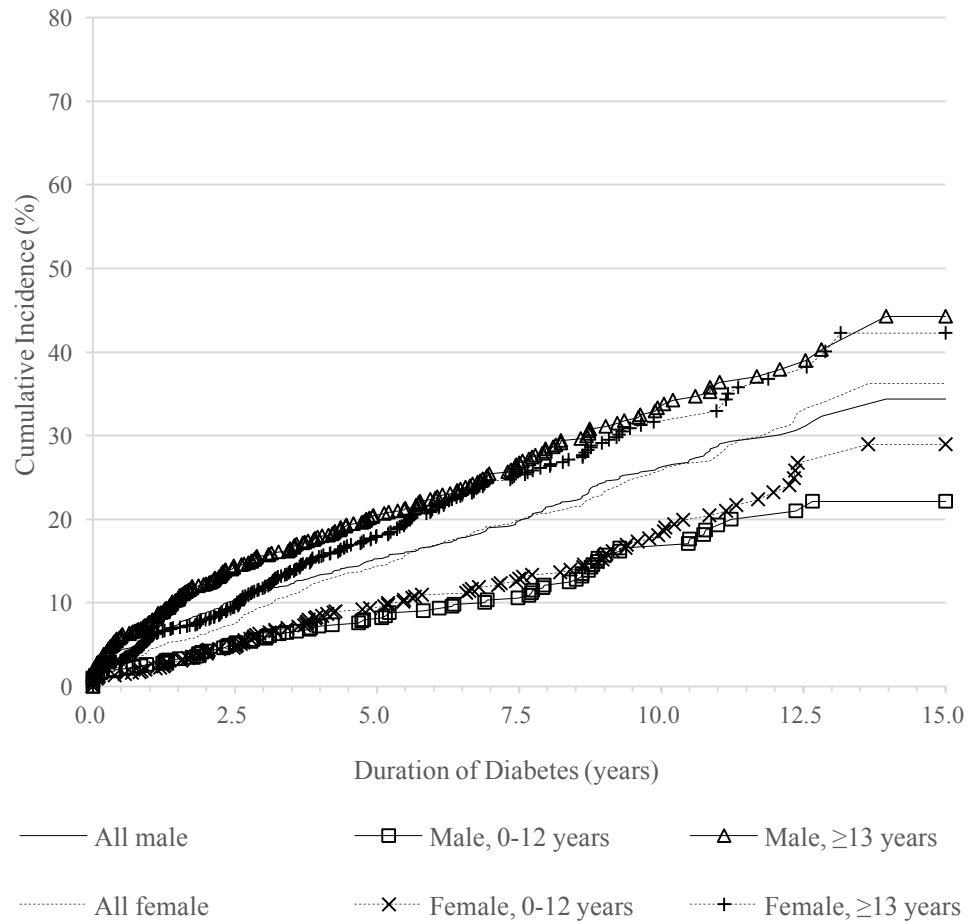

### Renal failure

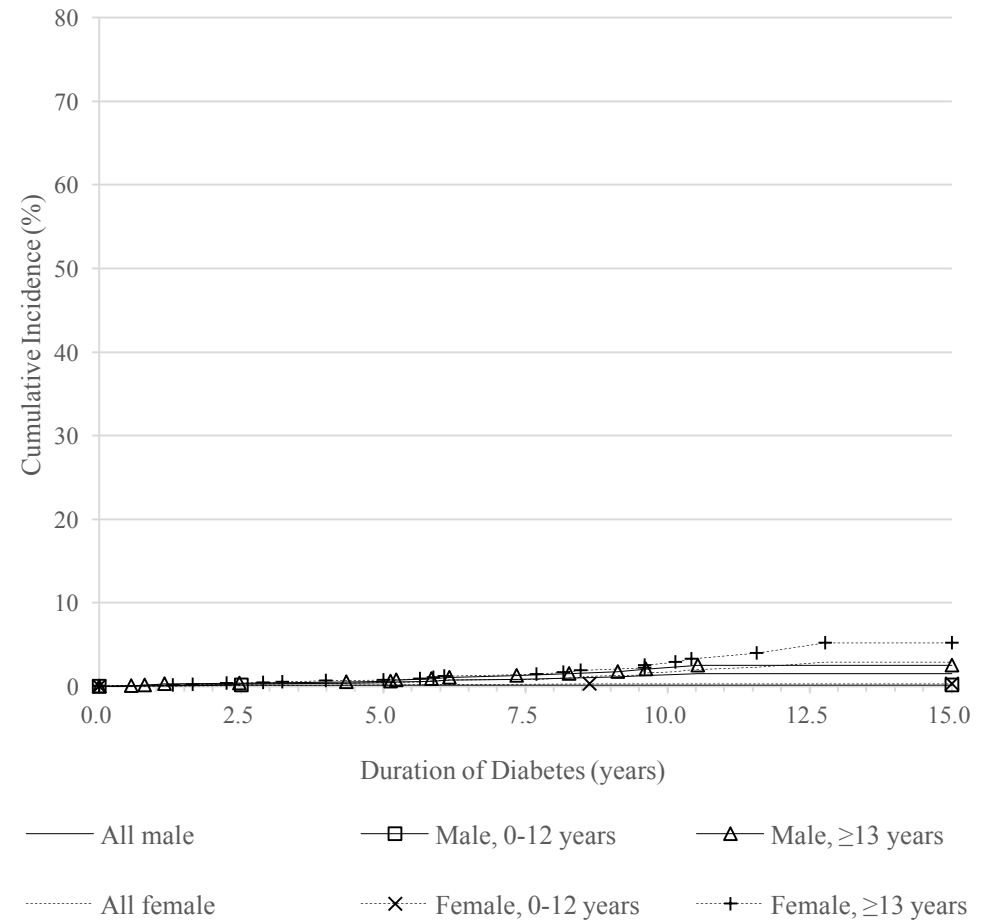

Cardiovascular disease

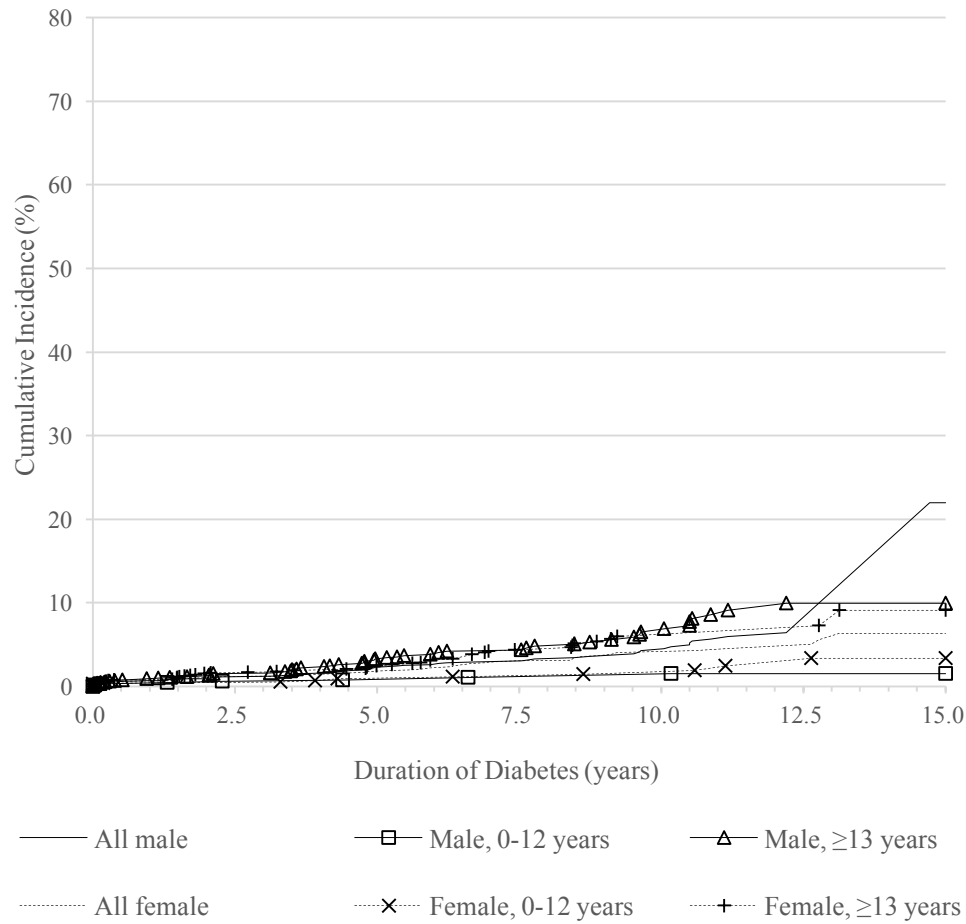

Diabetic ketoacidosis

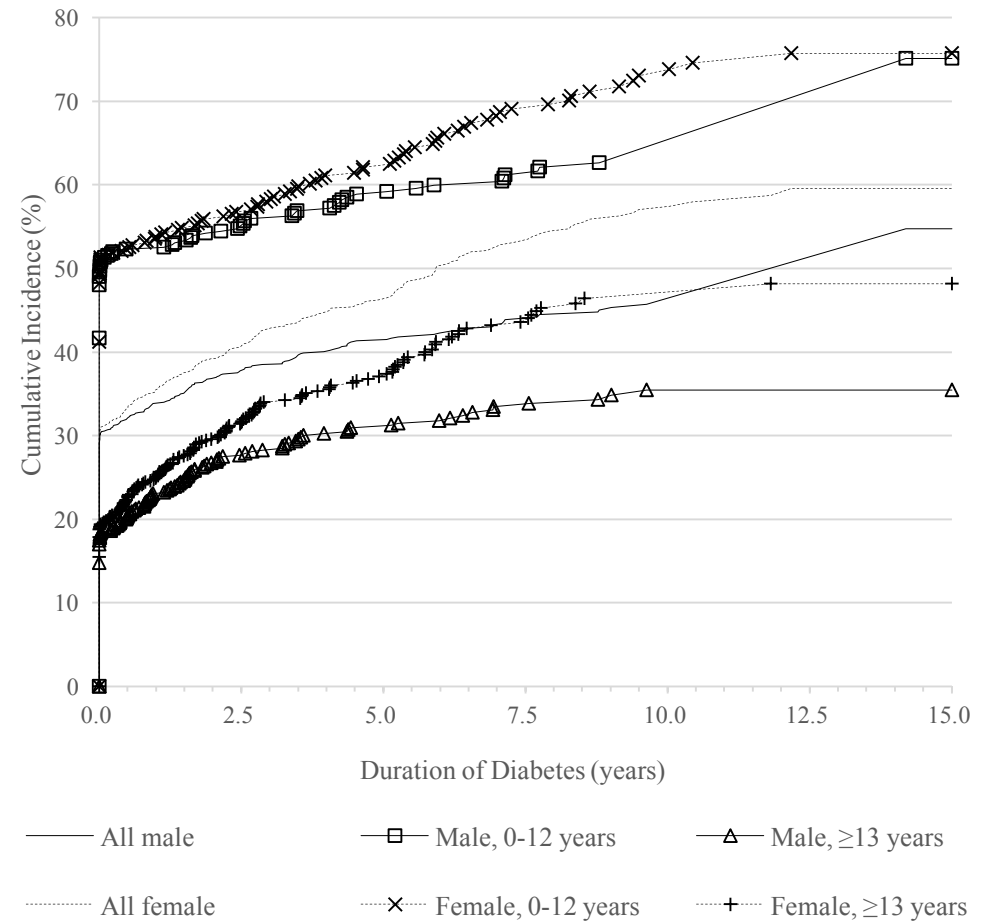

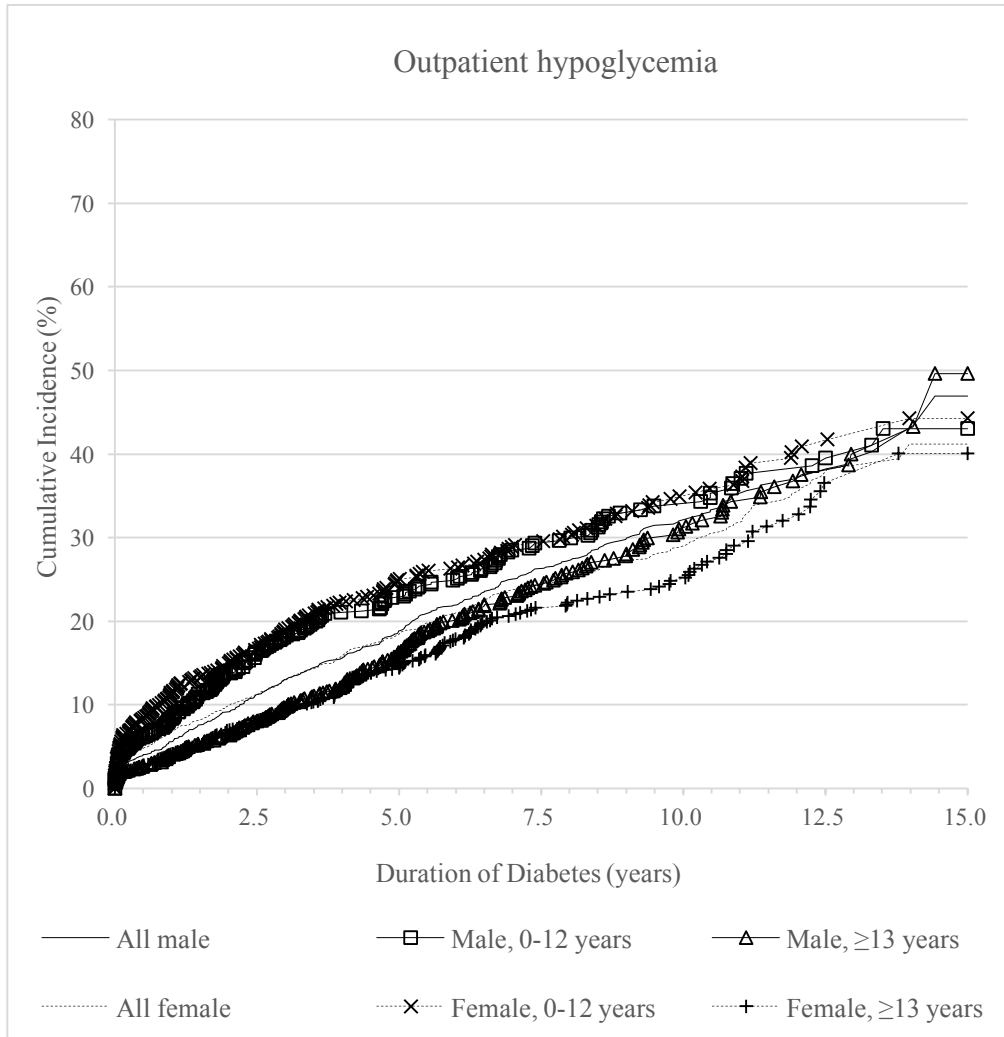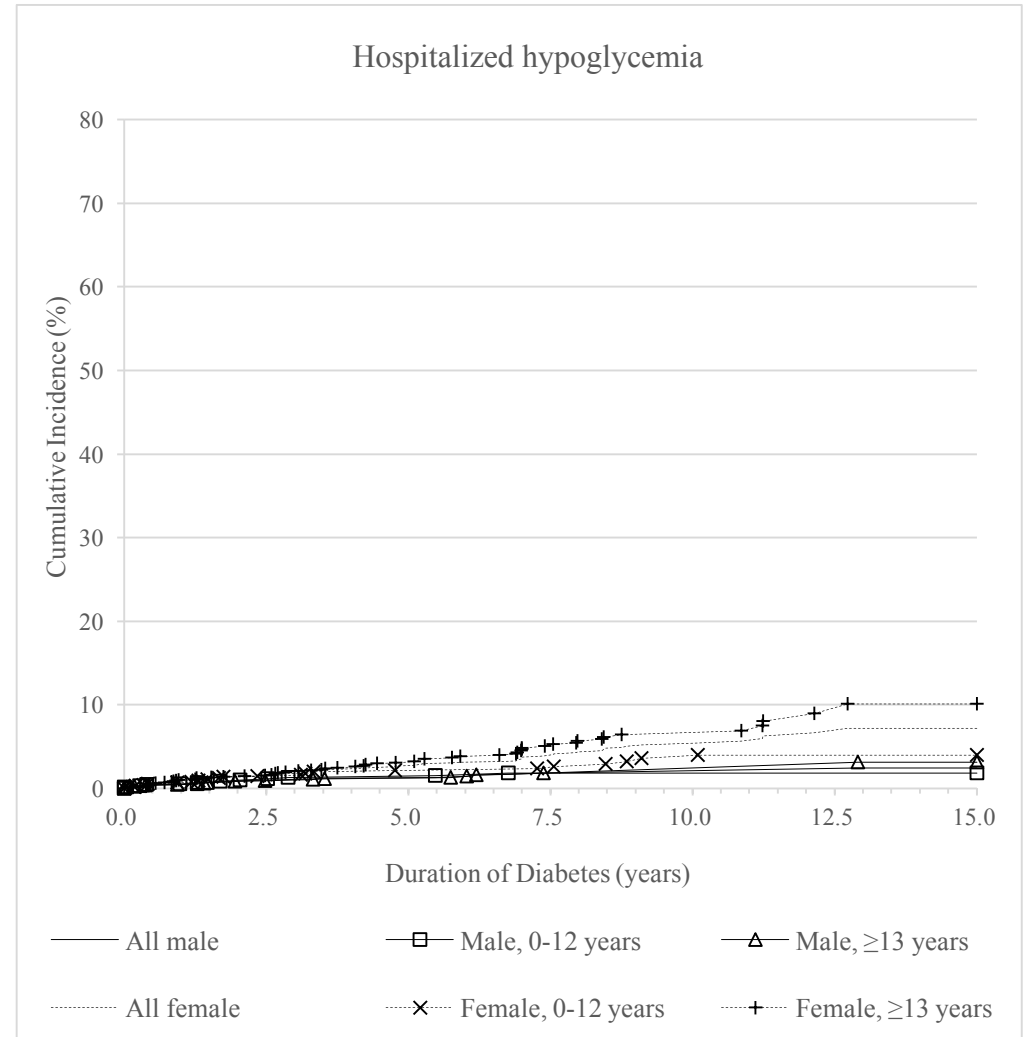

**Note:**

$p$  value for comparison of cumulative incidence of retinopathy for male vs. female was 0.0006, for male, early vs. late-onset was 0.4553, for female, early vs. late-onset was 0.0908.

$p$  value for comparison of cumulative incidence of proliferative retinopathy for male vs. female was 0.0567, for male, early vs. late-onset was 0.0013, for female, early vs. late-onset was <.0001.

*p* value for comparison of cumulative incidence of sight-threatening diabetic retinopathy for male vs. female was 0.0405, for male, early vs. late-onset was <.0001, for female, early vs. late-onset was <.0001.

*p* value for comparison of cumulative incidence of neuropathy for male vs. female was 0.4050, for male, early vs. late-onset was <.0001, for female, early vs. late-onset was <.0001.

*p* value for comparison of cumulative incidence of nephropathy for male vs. female was 0.6191, for male, early vs. late-onset was <.0001, for female, early vs. late-onset was <.0001.

*p* value for comparison of cumulative incidence of renal failure for male vs. female was 0.4222, for male, early vs. late-onset was 0.0078, for female, early vs. late-onset was 0.0003.

*p* value for comparison of cumulative incidence of cardiovascular disease for male vs. female was 0.4655, for male, early vs. late-onset was <.0001, for female, early vs. late-onset was 0.0004.

*p* value for comparison of cumulative incidence of diabetic ketoacidosis for male vs. female was 0.0015, for male, early vs. late-onset was <.0001, for female, early vs. late-onset was <.0001.

*p* value for comparison of cumulative incidence of outpatient hypoglycemia for male vs. female was 0.4095 for male, early vs. late-onset was 0.0097, for female, early vs. late-onset was <.0001.

*p* value for comparison of cumulative incidence of hospitalized hypoglycemia for male vs. female was <.0001, for male, early vs. late-onset was 0.9600, for female, early vs. late-onset was 0.0113.
