# Supplementary material for: Incidence of diabetes-related complications in Chinese patients with type 1 diabetes: a population-based longitudinal cohort study in Taiwan
Source: PubMed Central journal article supplement — BMJ Open. 2017 Jun 21;7(6):e015117. doi: 10.1136/bmjopen-2016-015117 (PMC5791549; doi:10.1136/bmjopen-2016-015117), 2017-06-21

Supplementary Figure 2: Cumulative incidence of hospitalized for hypoglycemia according to the duration of diabetes in patients with type 1 diabetes (shadow area indicates 95 % confidence interval)

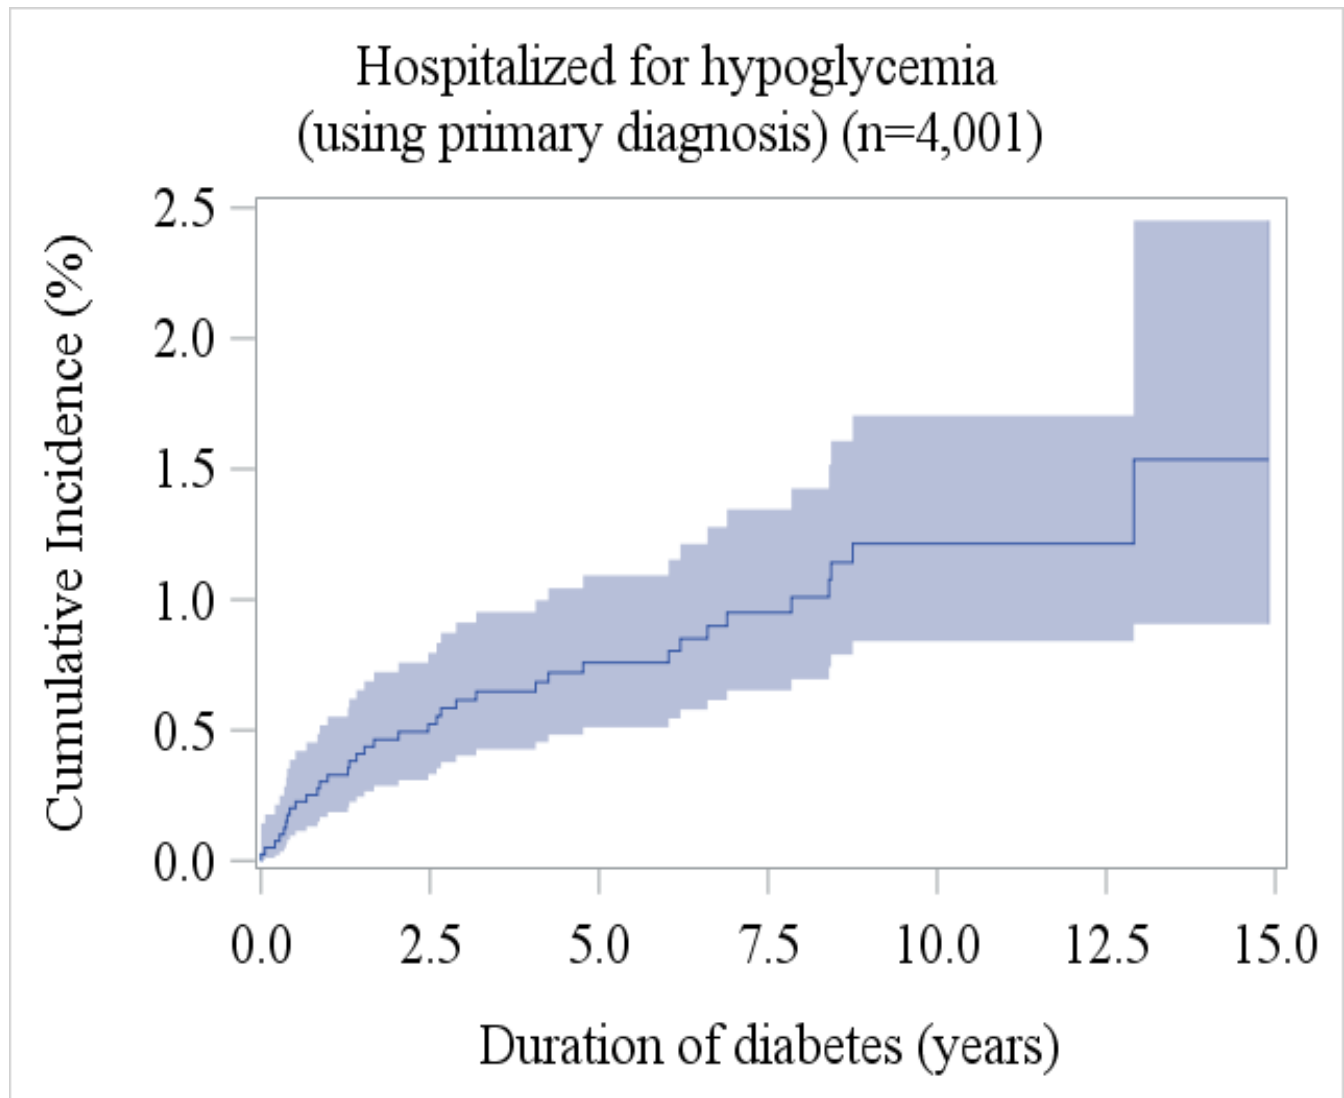

Supplement: bmjopen-2016-015117supp003.pdf [file bmjopen-2016-015117supp003.pdf]
