# Supplementary material for: Incidence of diabetes-related complications in Chinese patients with type 1 diabetes: a population-based longitudinal cohort study in Taiwan
Source: PubMed Central journal article supplement — BMJ Open. 2017 Jun 21;7(6):e015117. doi: 10.1136/bmjopen-2016-015117 (PMC5791549; doi:10.1136/bmjopen-2016-015117), 2017-06-21
Supplement: bmjopen-2016-015117supp004.pdf [file bmjopen-2016-015117supp004.pdf]

**Supplementary Figure 3: Age-sex-specific cumulative incidences of hospitalized for hypoglycemia according to duration of diabetes in patients with type 1 diabetes (early-onset: 0-12 years, late-onset:  $\geq 13$  years)**

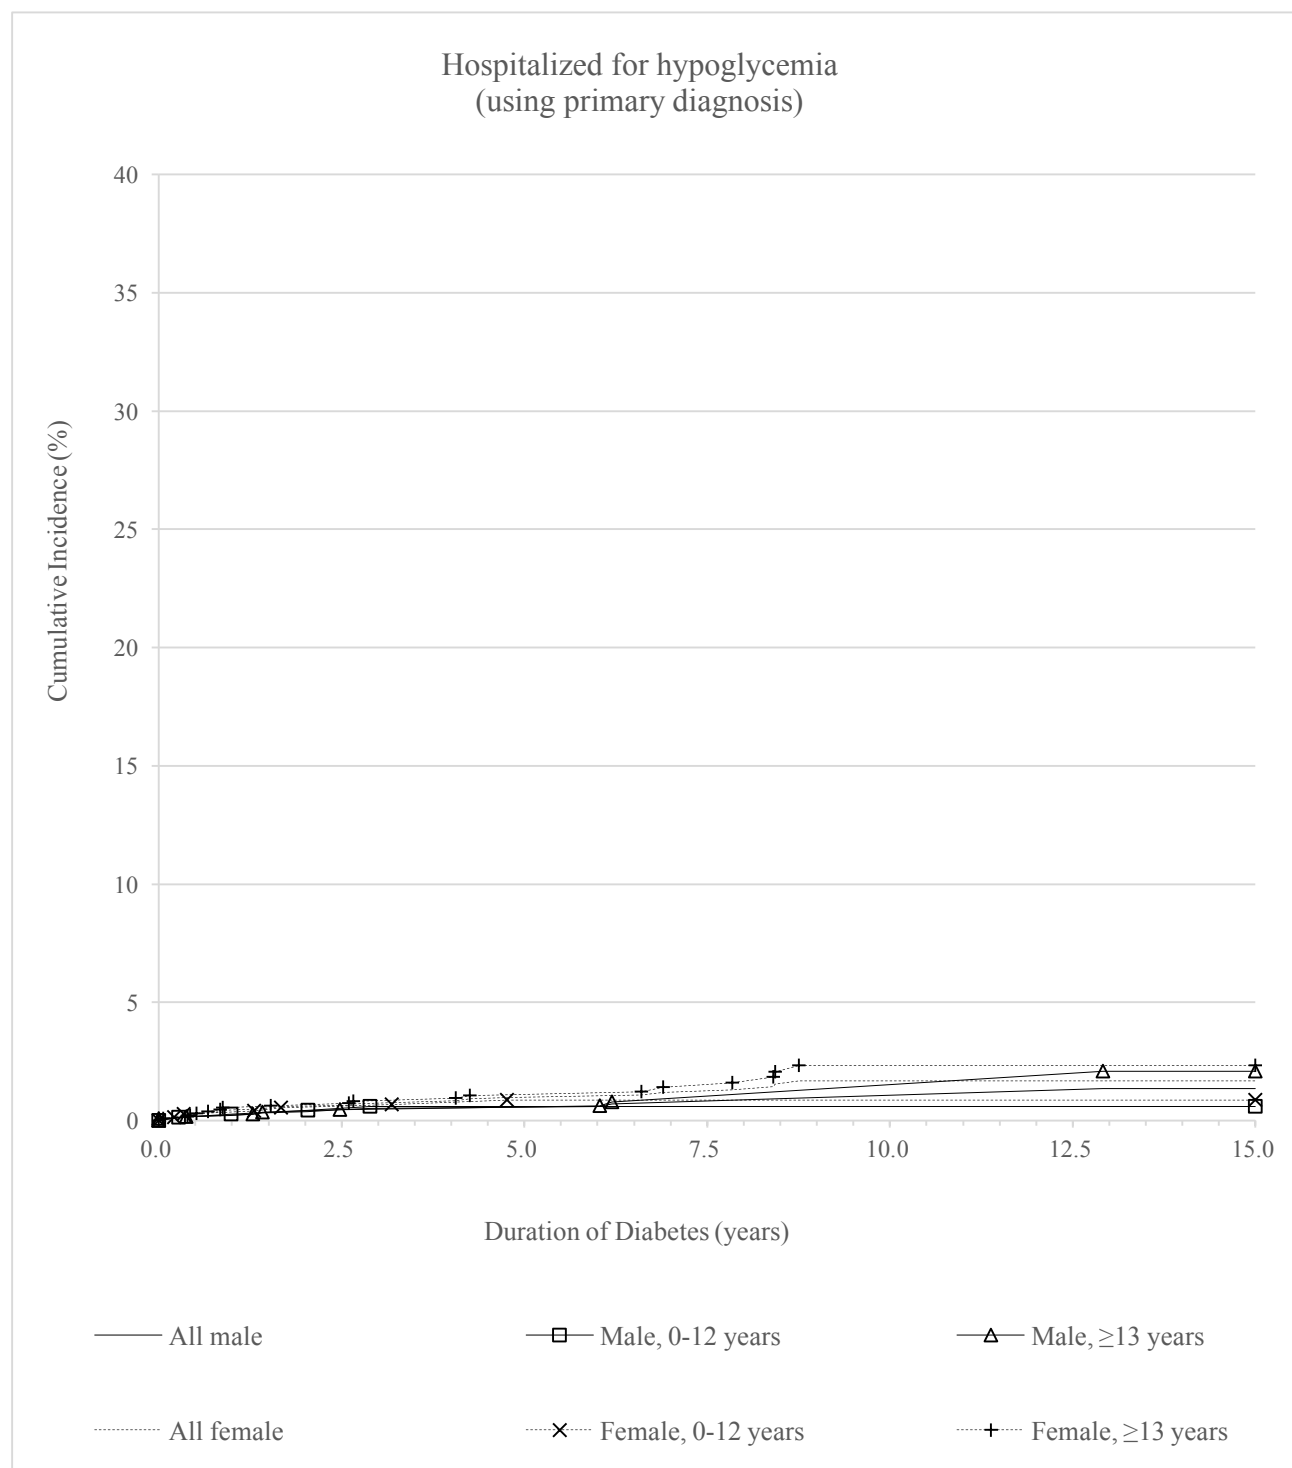

Note:

*p* value for comparison of cumulative incidence for male vs. female was 0.0782, for male, early vs. late-onset was 0.6272, for female, early vs. late-onset was 0.1326.
